# Supplementary material
Source: publisher site journal article supplement (https://www.spandidos-publications.com/3575/downloadSupplementary)

Figure S1. miR-1184 agomir mediates the expression levels of FOXO1, p27 Kip1 and CDK2 in HK-2 cells. (A) HK-2 cells were transfected with agomir-NC or miR-1184 agomir. The expression level of miR-1184 in HK-2 cells was detected using reverse transcription-quantitative PCR. (B) HK-2 cells were treated with cisplatin, cisplatin + agomir-NC or cisplatin + miR-1184 agomir. The expression levels of FOXO1, p27 Kip1 and CDK2 in HK-2 cells were detected by western blotting. The relative expression levels of (C) FOXO1, (D) p27 Kip1 and (E) CDK2 were semi-quantified by normalization to  $\beta$ -actin. \*\* $P < 0.01$  vs. control; ## $P < 0.01$  vs. cisplatin. miR, microRNA; FOXO1, forkhead box O1; NC, negative control.

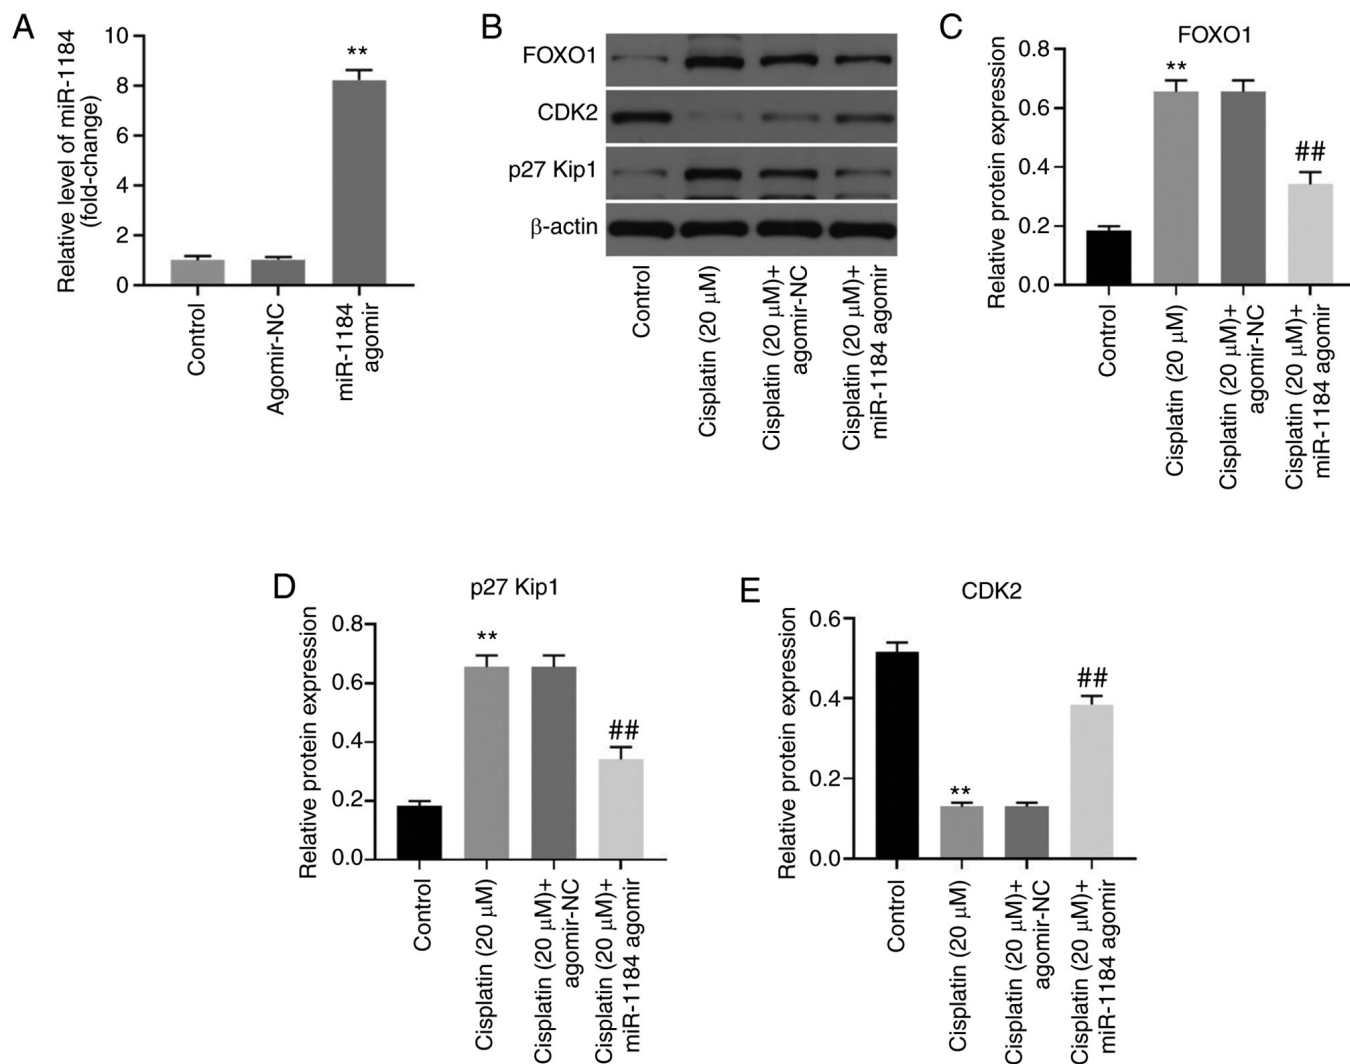

Supplement: Supplementary file 1 [file downloadSupplementary]
